# Supplementary material for: Volatile Compounds Content, Physicochemical Parameters, and Antioxidant Activity of Beers with Addition of Mango Fruit (Mangifera Indica)
Source: MDPI journal article supplement (doi:10.3390/molecules25133033), 2020-07-02

# Supplementary Materials

## Volatile Compounds Content, Physicochemical Parameters, and Antioxidant Activity of Beers with Addition of Mango Fruit (*Mangifera Indica*)

Figure S1 Mass spectrum of unknown volatile compound (RT 17.059)

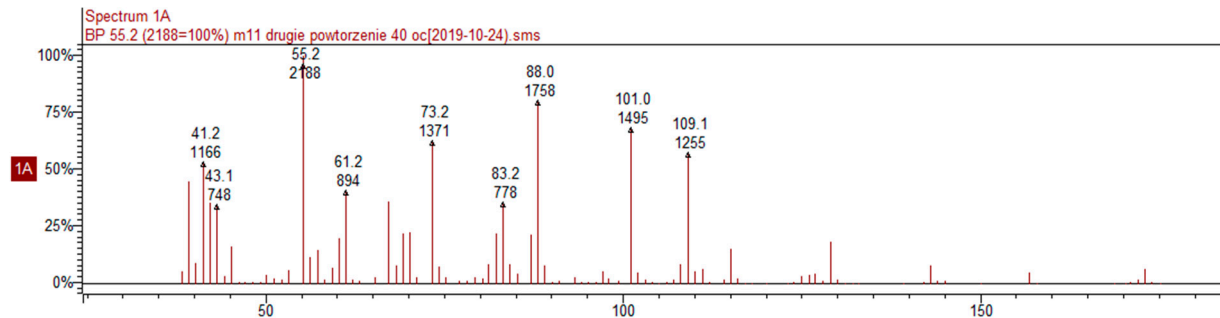

Figure S2 Total ion chromatogram of MP

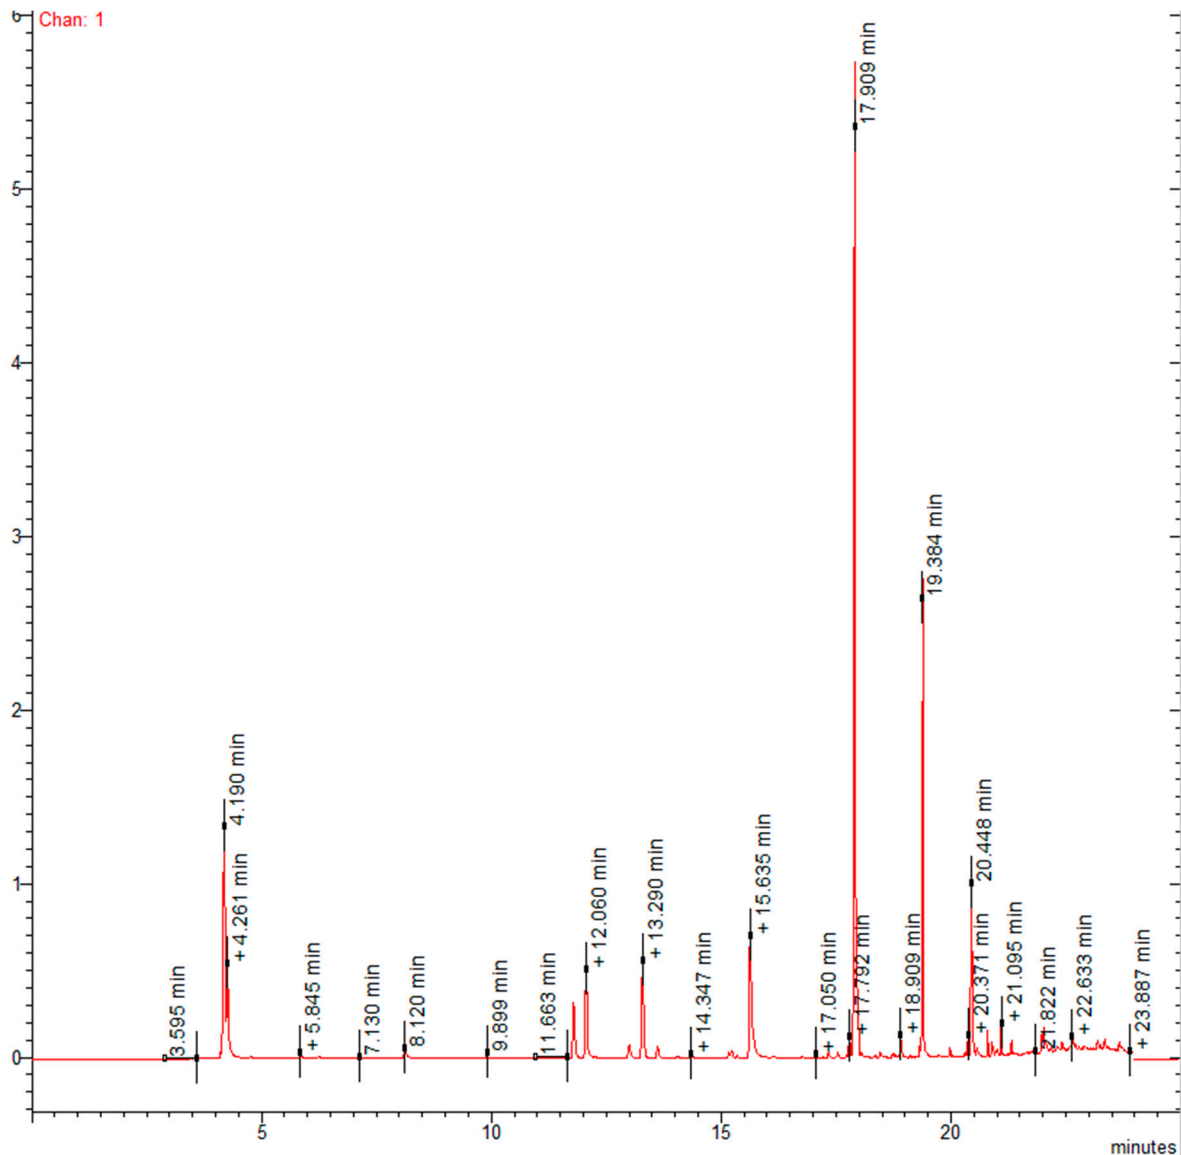

Supplement: s1 [file s1]
